# Supplementary material for: Facile synthesis of a hierarchical CuS/CuSCN nanocomposite with advanced energy storage properties
Source: Royal Society of Chemistry journal article supplement (doi:10.1039/c8nj02843e), 2018-01-01
Supplement: c8nj02843e1.pdf [file c8nj02843e1.pdf]

**Supporting information for**  
**Facile synthesis of hierarchical CuS/CuSCN nanocomposite with**  
**advanced energy storage properties**

Yasun Y. Kannangara,<sup>1</sup> Pichaimani Prabunathan,<sup>2</sup> and Jang-Kun Song<sup>\*,1</sup>

<sup>1</sup>*School of Electronic and Electrical Engineering, Sungkyunkwan University, Suwon, Gyeonggi-do  
16419, South Korea*

<sup>2</sup>*Department of Handloom and Textile Technology, Indian Institute of Handloom Technology  
Salem, Salem-636001, India*

\* [jk.song@skku.edu](mailto:jk.song@skku.edu)

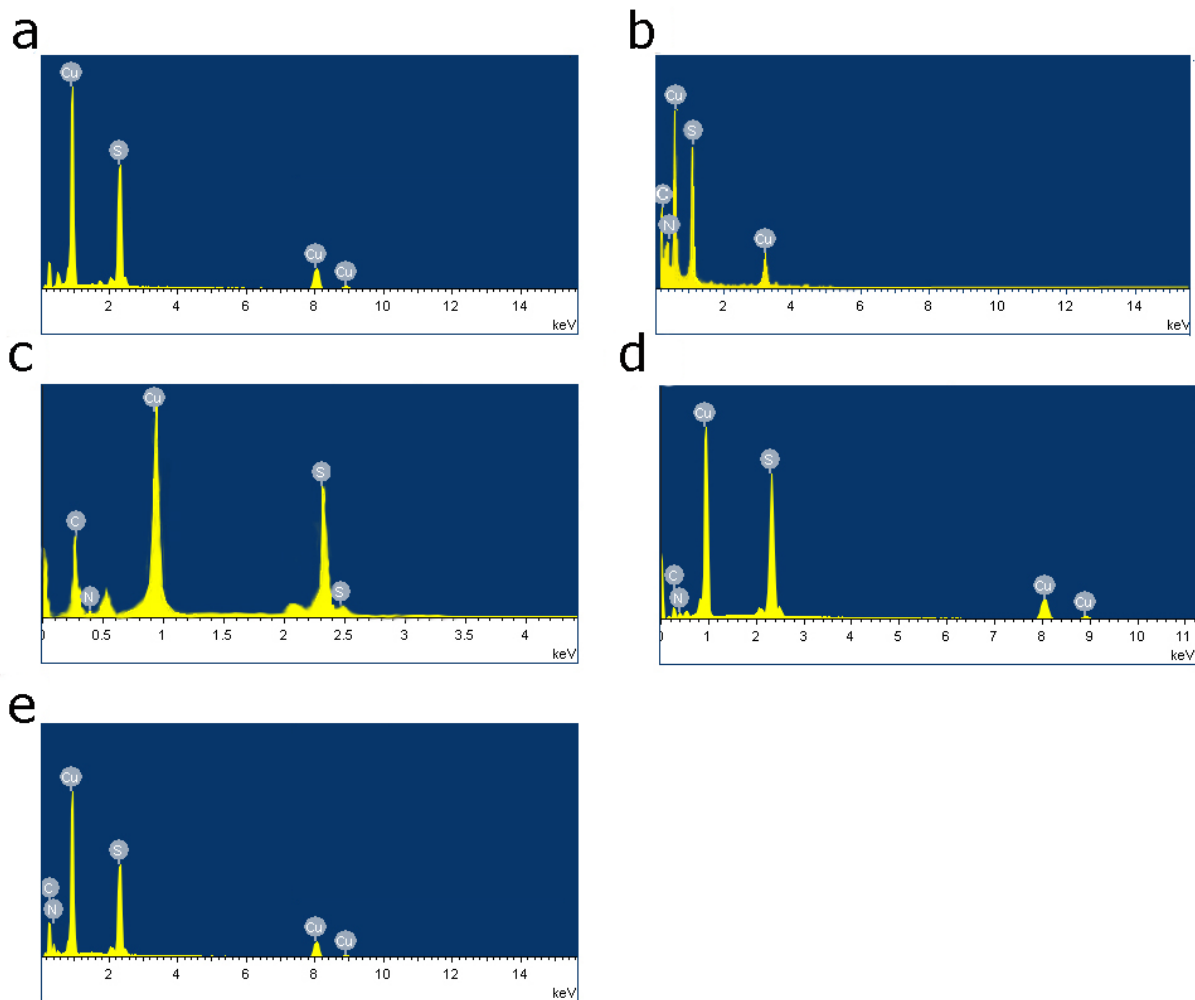

**Supporting Figure S1: EDX graphs for (a) CuS, nanocomposite of CuS/CuSCN (b) 3:1, (c) 1:1, (d) 1:3 and (e) pure CuSCN**

These EDX spectrums shown the qualitative data confirms the presence of Cu, S, N and C.

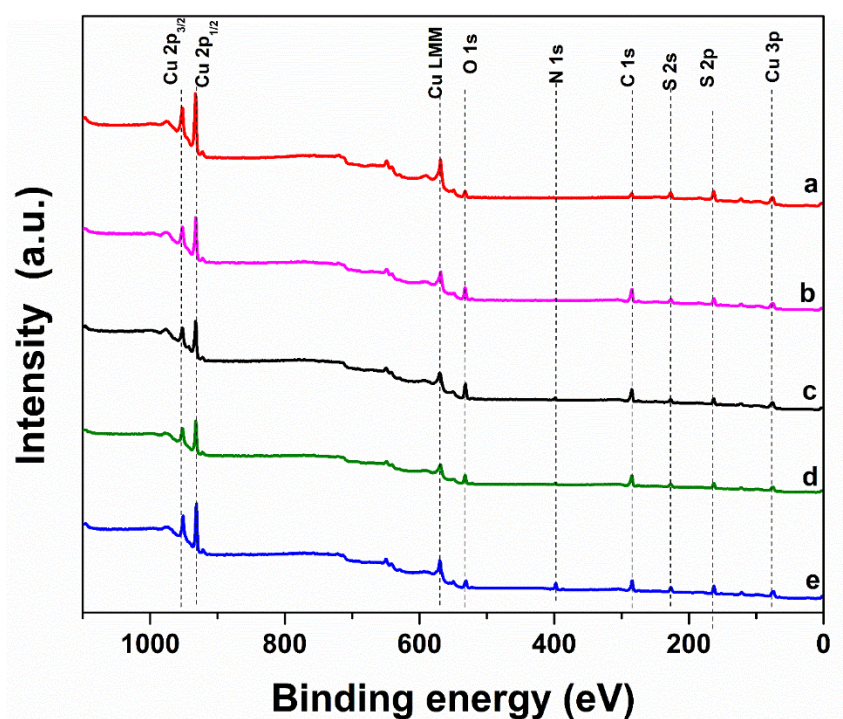

**Supporting Figure S2: Survey spectrum for XPS data for (a) CuS, nanocomposite of CuS/CuSCN (b) 3:1, (c) 1:1, (d) 1:3 and (e) CuSCN**

The elemental compositions of CuS, CuSCN and their nanocomposites further analysed by the XPS measurements. This XPS survey spectrum depicted the signals of the presence of Cu, S, N and C elements as well as O element. The peaks of O may come from H<sub>2</sub>O vapor from the atmosphere, O<sub>2</sub> or absorbed CO<sub>2</sub> in the surface of the sample. **a**, The N 1s peak is disappeared in CuS and gradually appeared with increasing the peak intensity within CuSCN concentration, clearly depicted in Fig 3.

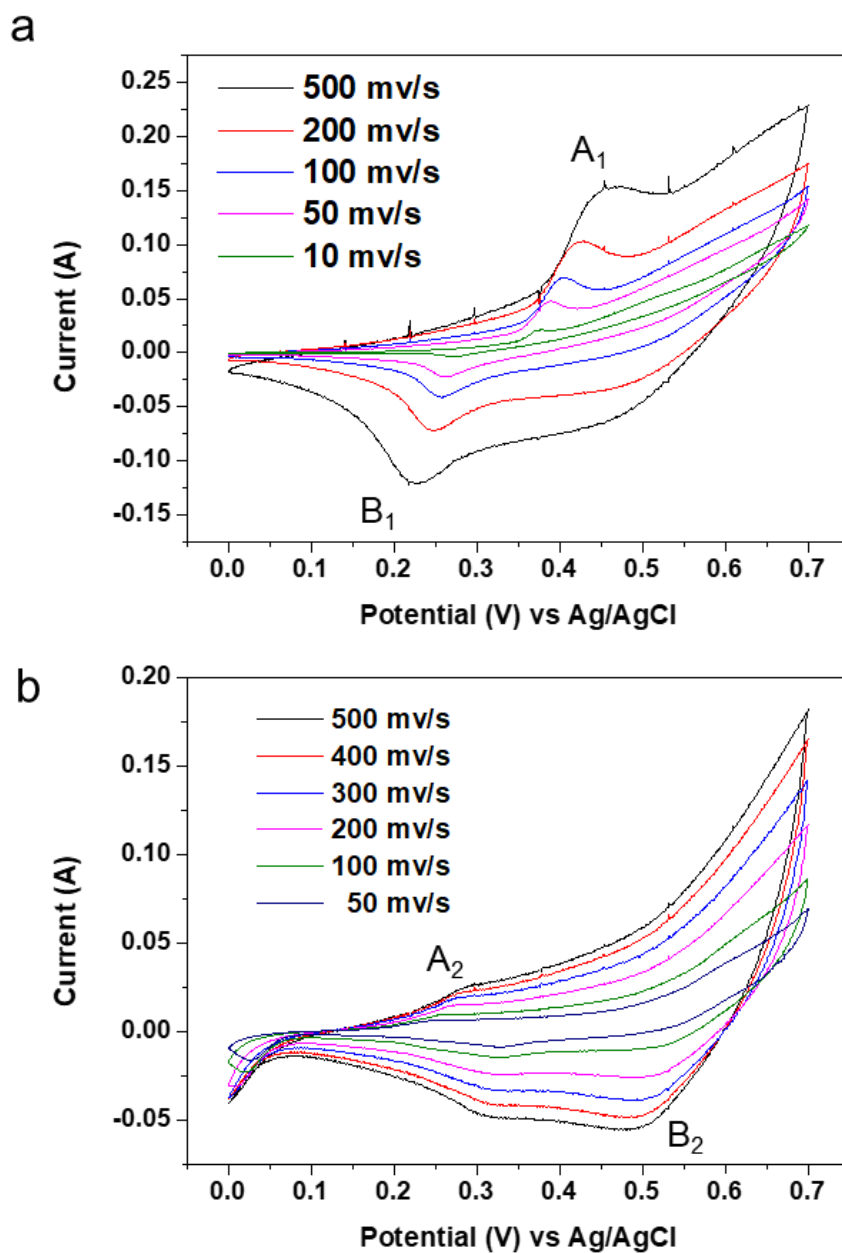

**Supporting Figure S3: Cyclic voltammogram of pure CuS and CuSCN electrodes with different scan rates.** (a) The cathodic current peak (A<sub>1</sub>) and anodic peak (B<sub>1</sub>) for pure CuS electrode. (b) The cathodic current peak (A<sub>2</sub>) and anodic peak (B<sub>2</sub>) for CuSCN electrode.

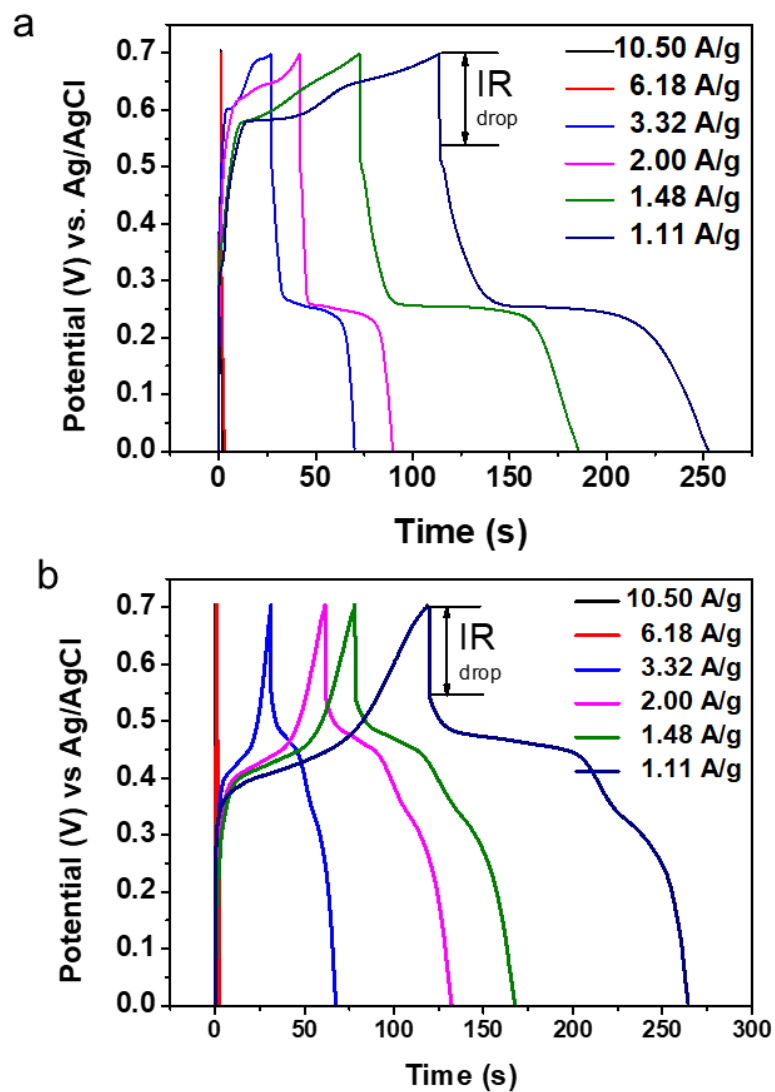

**Supporting Figure S4: Galvanostatic charge-discharge curve of pure CuS electrode (a) and CuSCN electrode (b) with different current densities.**

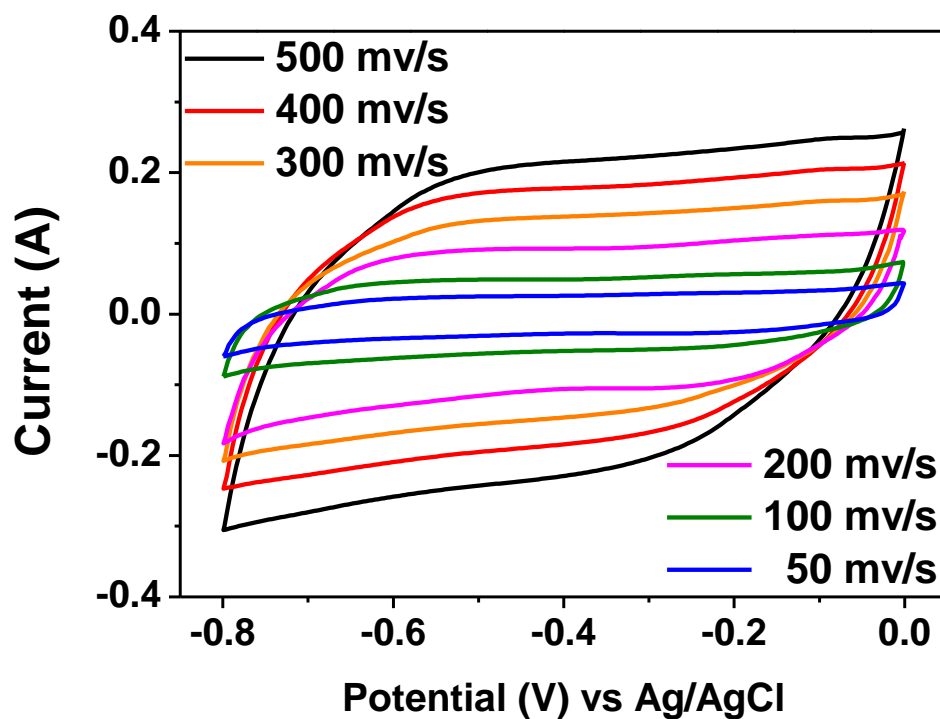

Supporting Figure S5: Cyclic voltammogram of activated carbon (AC) electrode with different scan rates
